# Supplementary material for: Neurofilament light interaction with GluN1 modulates neurotransmission and schizophrenia-associated behaviors
Source: PubMed Central journal article supplement (PMC6109052; doi:10.1038/s41398-018-0194-7), 2018-08-24

# Yuan et al. Supplemental Figure S3

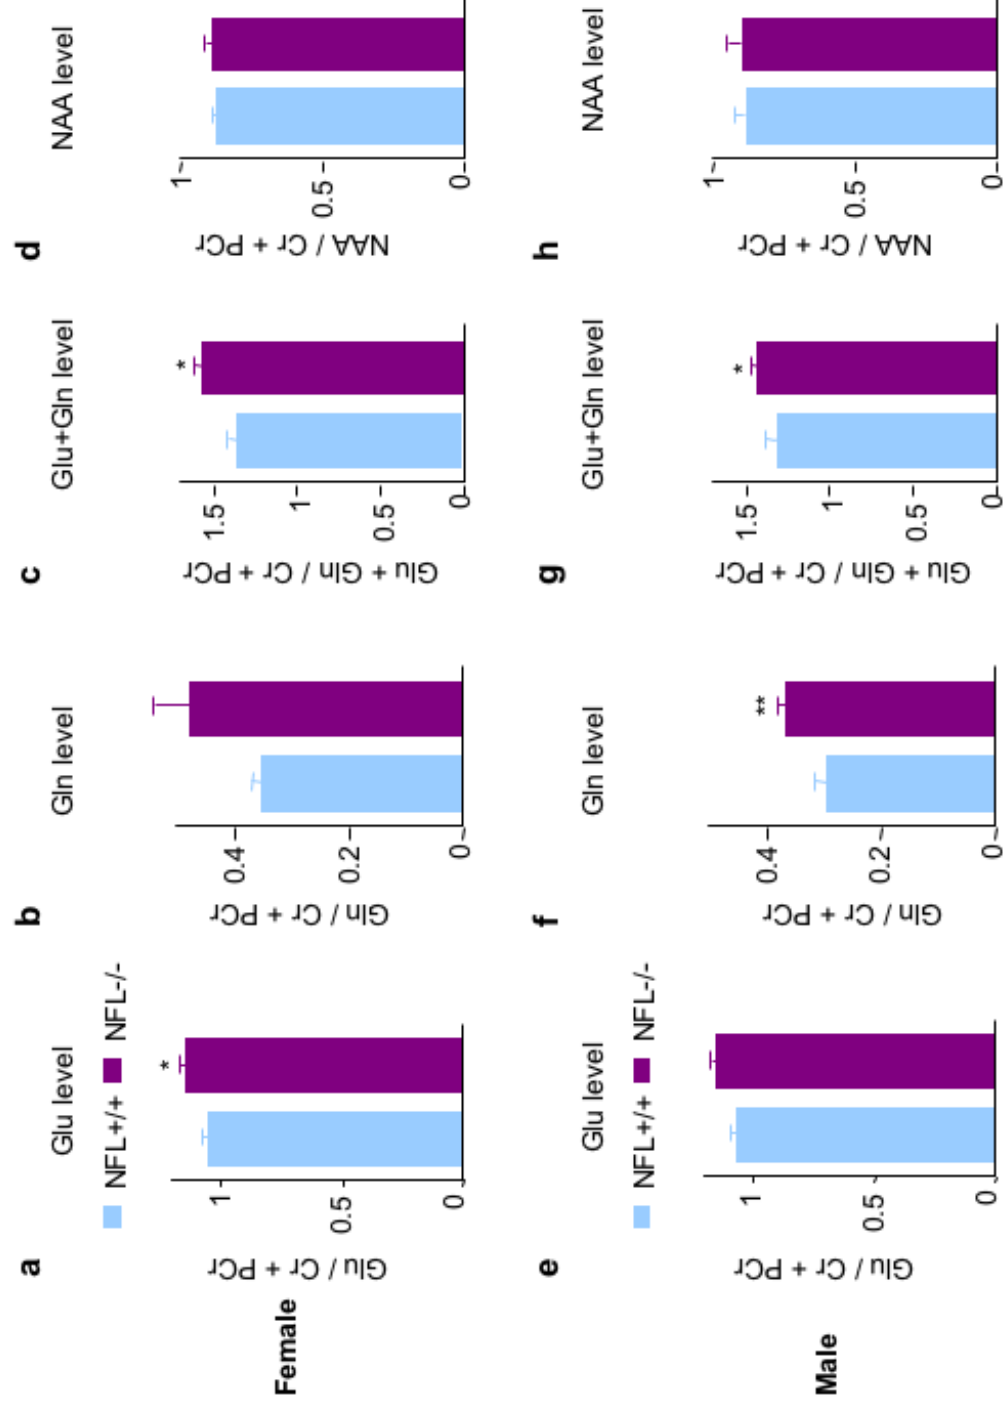

Supplement: 41398_2018_194_MOESM4_ESM.pdf [file 41398_2018_194_MOESM4_ESM.pdf]
