# Supplementary material for: Neurofilament light interaction with GluN1 modulates neurotransmission and schizophrenia-associated behaviors
Source: PubMed Central journal article supplement (PMC6109052; doi:10.1038/s41398-018-0194-7), 2018-08-24
Supplement: 41398_2018_194_MOESM8_ESM.pdf [file 41398_2018_194_MOESM8_ESM.pdf]

## Yuan et al. Supplemental Table S3

### Change of dendrite length in dentate gyrus granule cells of NFL +/- mice

|                                                 | NFL+/+ | NFL+/+ SE | NFL-/- | NFL-/- SE | p-value (T-test) |
|-------------------------------------------------|--------|-----------|--------|-----------|------------------|
| Total dendrite length measured                  | 983    | 58        | 827    | 81        | 0.141            |
| Number of branch points                         | 5.3    | 0.3       | 5.9    | 0.67      | 0.402            |
| Total length of non-terminal segments           | 150    | 19        | 148    | 18.8      | 0.951            |
| Average length of non-terminal segments         | 27     | 2.56      | 25     | 2.05      | 0.417            |
| Number of natural endings                       | 4.1    | 0.29      | 3.4    | 0.26      | 0.219            |
| Total length of natural end terminal segments   | 622    | 49        | 438    | 39.46     | 0.021            |
| Average length of natural end terminal segments | 155    | 5.94      | 129    | 6.25      | 0.013            |
| Number of truncated ending                      | 2.8    | 0.29      | 3.8    | 0.64      | 0.154            |
| Total length of truncated end terminal segments | 219    | 33        | 216    | 41.42     | 0.955            |
| Average number of truncated end segments        | 76     | 6.05      | 59     | 8.06      | 0.15             |
| Average path length                             | 207    | 4.65      | 181    | 5.44      | 0.004            |
| Maximum path length                             | 227    | 7.09      | 195    | 7.94      | 0.023            |
